# Supplementary figures and images for: RNA polymerase mapping during stress responses reveals widespread nonproductive transcription in yeast
Source: Springer Nature journal article supplement (doi:10.1186/gb-2010-11-7-r75), 2010-07-16

Figure S11

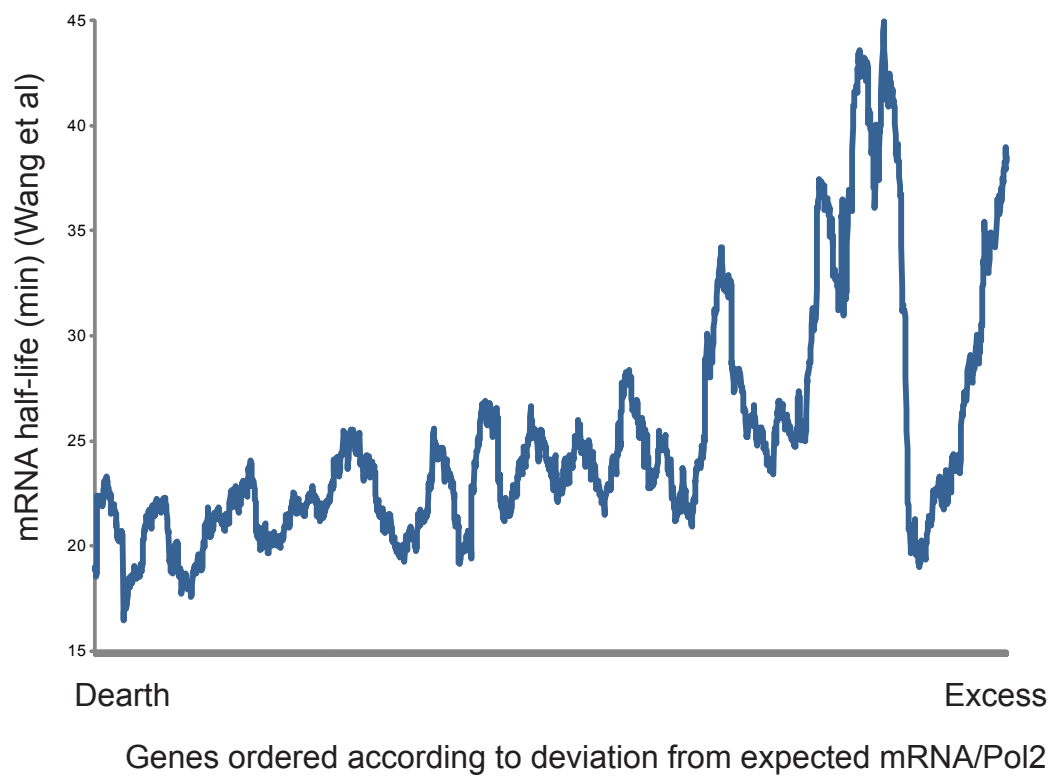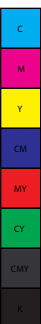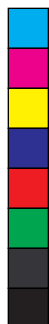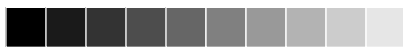

Supplement: Additional file 14 [file gb-2010-11-7-r75-s14.pdf]
